# Supplementary material
Source: publisher site journal article supplement (https://www.dovepress.com/get_supplementary_file.php?f=438352.docx)
Supplement: Supplementary file 1 [file get_supplementary_file.php]

**Appendix**

**Table A1** The details of the HPAP policy implementation process

| **Time** | **The policy document** | **Key policy measures** | **Administration** |
| --- | --- | --- | --- |
| 2015 | Decision on winning the battle against poverty | Formulation of the basic principles and policy framework for the HPAP. | the CPC Central Committee and The State Council |
| 2016 | Guiding opinions on the implementation of health Poverty alleviation projects | First, set to specific measures for the HPAP in the areas of health insurance protection, categorised medical assistance, payment mechanism, allocation of medical resources, basic public health, etc.; Second, decomposition of the key tasks to the governmental administration corresponding to the responsibility, and set to the schedule for the policy progress. | National Health Commission (NHC, previously China’s Ministry of Health), Poverty Alleviation Office of The State Council, Ministry of Finance of the People’s Republic of China, Ministry of Civil Affairs of the People’s Republic of China, National Healthcare Security Administration et al. |
| 2017 | Notice on the issuance of the "Three batches" action plan for Health Poverty alleviation project | Determine the policy target of the HPAP, referring to the registered poor population and rural low-income people (i.e. Dibao, China's transfer payment subsidy program for the basic living security of low-income poor families), special hardship cases, poor people with disabilities. Formulation of action measures: First, concentrated treatment for major diseases; Second, contracted service management for chronic diseases; Third, serious illnesses medical expenditure protection by financial support. |
| 2018 | Notice on the Issuance of the Implementation Plan for the Three-Year Action Plan for Health Poverty Alleviation | Achieve full coverage of health insurace protection, medical resources and basic public health services for the rural poor in the next three years. |
| 2019 | Notice on the issuance of a work project to address the outstanding issue of basic medical care coverage for the poor | Setting standards to guide work in four areas: healthcare institutions, healthcare practitioners, healthcare capacity and the health insurance system, with the aim of achieving effective coverage of primary healthcare for the rural poor families. |
| 2019 | Guidance on resolutely completing the hard task of fighting poverty through medical protection | In order to ensure the implementation and fulfilment of the difficult task of poverty alleviation through health insurance, specific policies have been introduced in the following areas: First, to ensure that the poor are not left out of the project. Second, to ensure that policies are put in place. Third, to avoid excessive levels of reimbursement for health insurance and medical assistance. Four, to achieve dynamic monitoring of the poor. Five, to achieve the smooth functioning of the health insurance fund. |

**Notes:** Table A1 mainly presents the process of the Chinese government's establishment of the HPAP policy system. The Chinese government has begun to explore a long-term working mechanism for the HPAP.

**Table A2** Definition of variables for healthcare utilization and healthcare costs

| **Variables** | **Definition** |
| --- | --- |
| **Dependent variables** |  |
| Physical examination | 1 for taking physical examination from last interview, 0 for otherwise. |
| Outpatient care | 1 for the respondent go to medical institution for outpatient care in the last month, 0 for otherwise. |
| Inpatient care | 1 for the respondent go to medical institution for inpatient care in the past year, 0 for otherwise. |
| Self-treatment | 1 for the self-treatment measures taken by respondents during the past month, 0 for otherwise. |
| Loutpacare_total | Total cost (unit: yuan) for outpatient care during the last month (in logarithmic form). |
| Loutpacare_oop | Out-of-pocket payments (unit: yuan) for outpatient care during the last month (in logarithmic form). |
| Loutpacare_total1 | Total cost (unit: yuan) for outpatient care during the last time (in logarithmic form). |
| Loutpacare_oop1 | Out-of-pocket payments (unit: yuan) for outpatient care during the last time (in logarithmic form). |
| Linpacare_total | Total cost (unit: yuan) for inpatient care during the last year (in logarithmic form). |
| Linpacare_oop | Out-of-pocket payments (unit: yuan) for inpatient care during the last year (in logarithmic form). |
| Linpacare_total1 | Total cost (unit: yuan) for inpatient care during the last time (in logarithmic form). |
| Linpacare_oop1 | Out-of-pocket payments (unit: yuan) for inpatient care during the last time (in logarithmic form). |
| Lselfmedicare_total | Total cost (unit: yuan) for self-treatment during the last month (in logarithmic form). |
| Lselfmedicare_oop | Out-of-pocket payments (unit : yuan) for self-treatment during the last month (in logarithmic form). |
| Lmedi_expen | Household medical expenditure during the last year (in logarithmic form). |
| Lfctp | Household affordability for payment is defined as household consumption expenditure minus household food expenditure (in logarithmic form). |
| CHE | Catastrophic health expenditure is defined as household medical expenditure exceeding 40% of the household affordability for payment |
| Smoke | 1 for respondents engaged in smoking behaviour, 0 for otherwise. |
| Drink | 1 for respondents engaged in drinking behaviour, 0 for otherwise. |

**Notes:** Table A2 report the definition of the dependent variables to examine the impact of HPAP on healthcare utilization and healthcare costs. Our study have used the logarithmic form for all healthcare costs to avoid extreme outliers from affecting the policy evaluation. All currency units are in RMB Yuan.

**Table A3.** Summary statistic for healthcare utilization and healthcare costs

| **Variable** | **Total** | **Access to HPAP** | **Not eligible for HPAP** |
| --- | --- | --- | --- |
| **Policy outcomes** |  |  |  |
| Physical examination, n(%) | 23935(52.11%, N=45932) | 3465(51.55%, N=6722 ) | 20470(52.21%, N= 39210) |
| Outpatient care, n(%) | 8926(19.48%, N=45818) | 1533(22.83%, N=6716) | 7393(18.91%, N=39102) |
| Inpatient care, n(%) | 5770(12.56%, N=45932) | 1220(18.15%, N=6722) | 4550(11.6%, N=39210) |
| Self-treatment, n(%) | 24510(53.36%, N=45932) | 3991(59.37%, N=6722) | 20519(52.33%, N=39210) |
| Loutpacare_total | 5.28(1.87,N=8712) | 5.27(2.03, N=1496) | 5.28(1.84, N=7216) |
| Loutpacare_oop | 5.06(1.85, N=8609) | 5.0(1.95, N=1462) | 5.08(1.83, N=7147) |
| Loutpacare_total1 | 4.95(1.93, N=8625) | 4.95(2.08, N=1477) | 4.94(1.89, N=7148) |
| Loutpacare_oop1 | 4.75(1.87, N=8513) | 4.66(1.98, N=1445) | 4.77(1.85, N=7068) |
| Linpacare_total | 8.44(1.42, N=5555) | 8.34(1.53, N=1170) | 8.46(1.39, N=4385) |
| Linpacare_oop | 7.61(1.96, N=5447) | 7.22(2.19, N=1144) | 7.71(1.88, N=4303) |
| Linpacare_total1 | 8.21(1.39, N=5486) | 8.01(1.51, N=1141) | 8.26(1.36, N=4345) |
| Linpacare_oop1 | 7.37(1.97, N=5345) | 6.87(2.19, N=1114) | 7.51(1.88, N=4231) |
| Lselfmedicare_total | 4.32(1.45, N=23093) | 4.48(1.44, N=3743) | 4.29(1.45, N=19350) |
| Lselfmedicare_oop | 4.28(1.45, N=22645) | 4.43(1.44, N=3701) | 4.25(1.45, N=18944) |
| Lmedi_expen | 7.44(1.50, N=31625) | 7.58(1.55, N=4812) | 7.41(1.50, N=26813) |
| Lfctp | 8.95(1.34, N=37241) | 8.73(1.35, N=5534) | 8.99(1.33, N=31707) |
| Smoke, n(%) | 6159(18.76%, N=32828) | 840(18.94%, N=4435) | 5319(18.73%, N=28393) |
| Drink, n(%) | 15130(32.99%, N=45869) | 2056(30.59%, N=6721) | 13074(33.4%, N=39148) |
| CHE, n(%) | 10768(30.15%, N=35709) | 2207(41.62%, N=5303) | 8561(28.16%, N=30406) |

**Notes:** Table A3 report summary statistics of the dependent variables used in the paper to examine the impact of HPAP on healthcare utilization and healthcare costs. For the dummy variables, Table A3 reports the number of samples and the percentage of samples that take the value 1. For continuous variables, Table A3 reports the mean and standard deviation. The sample sizes reported for all variables in Table 3 are based on the samples from the corresponding regressions.
